# Supplementary material
Source: PubMed Central journal article supplement (PMC2962452)

Supplemental Figure 1.

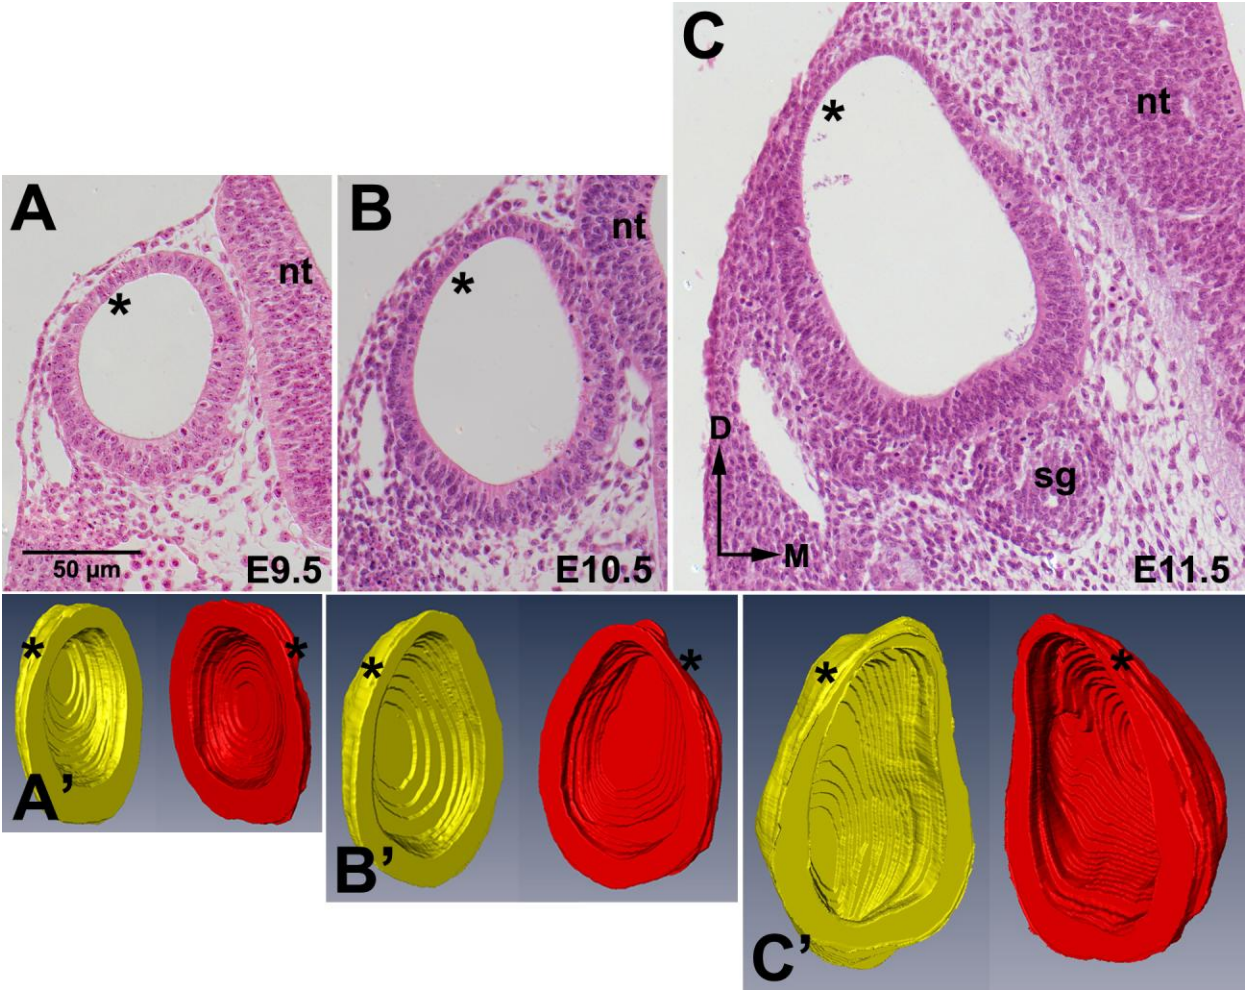

Supplemental Figure 2.

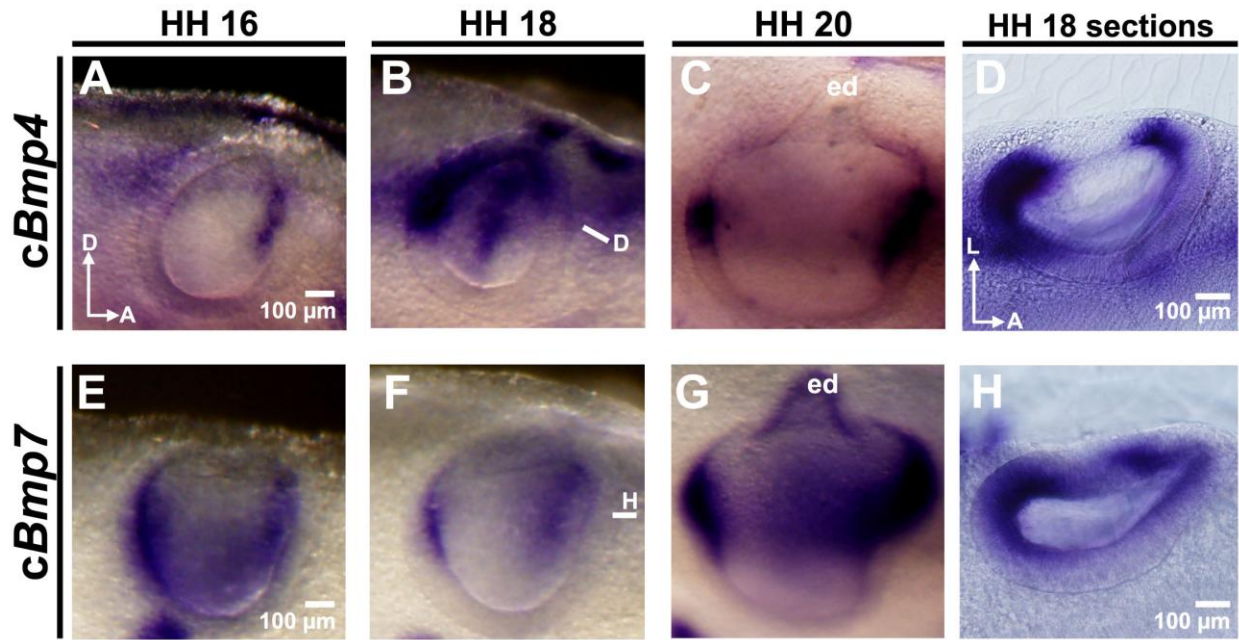

Supplemental Figure 3.

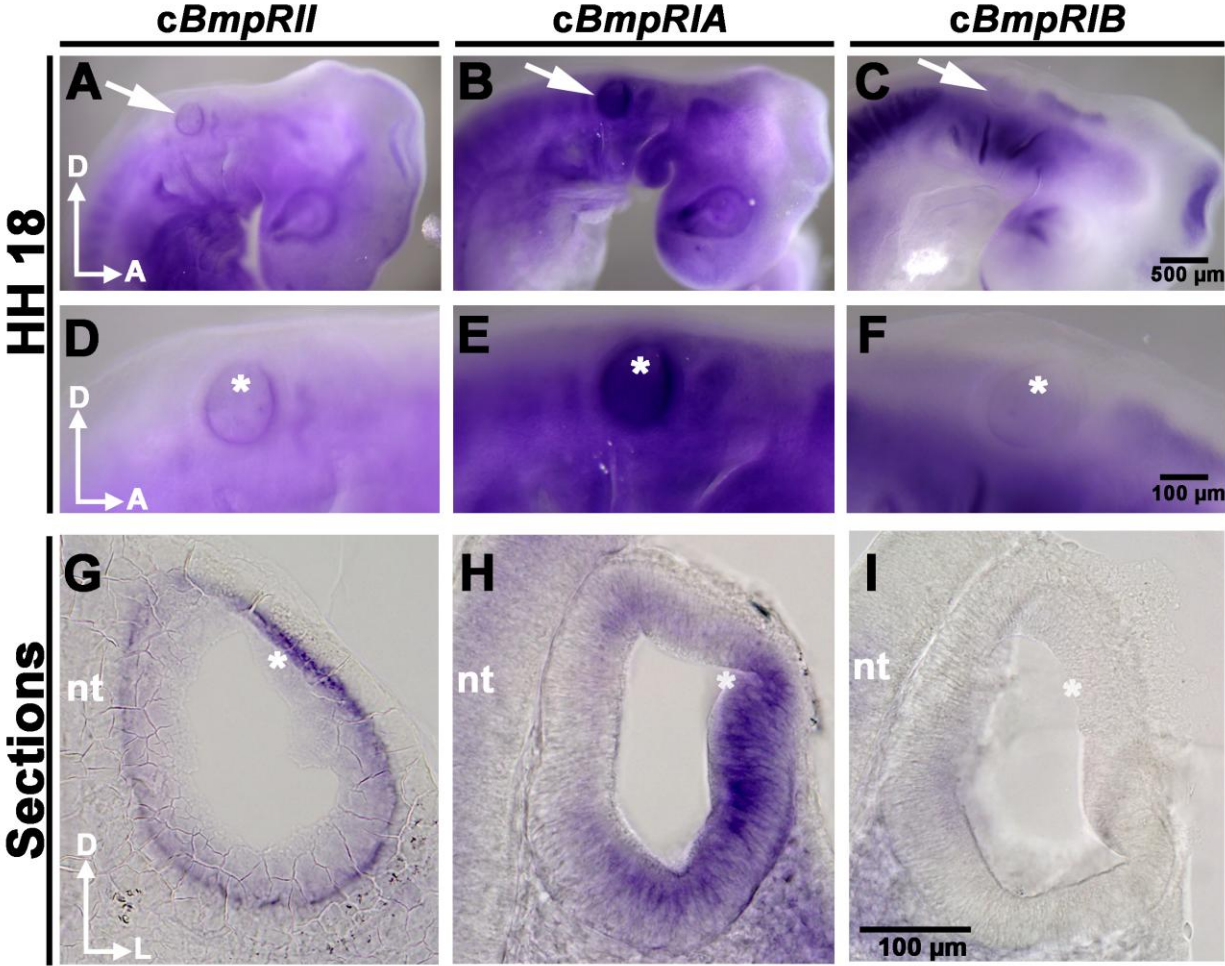



Supplemental Figure 4.

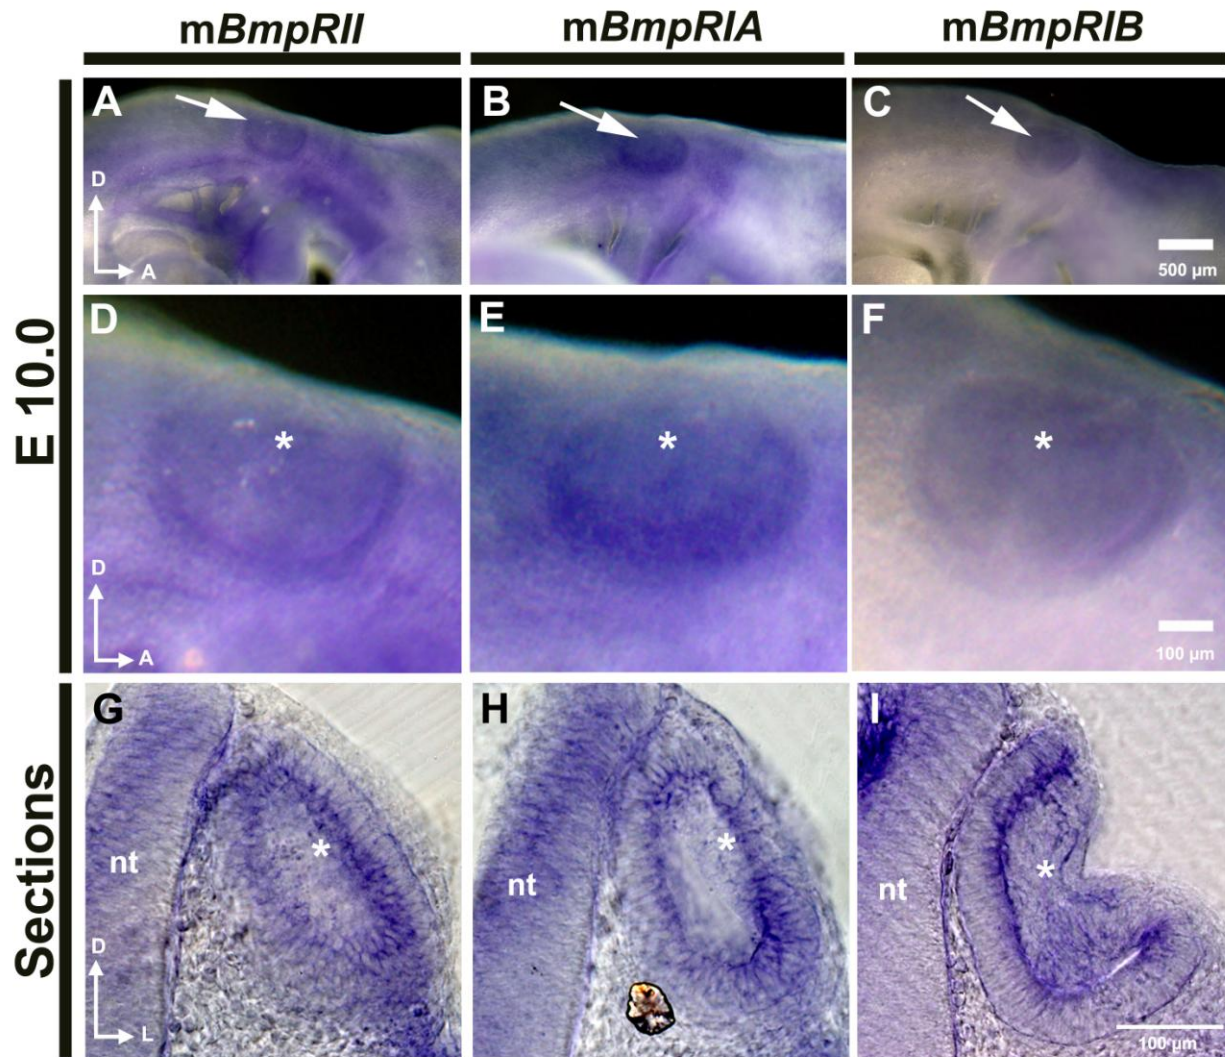

Supplemental Figure 5.

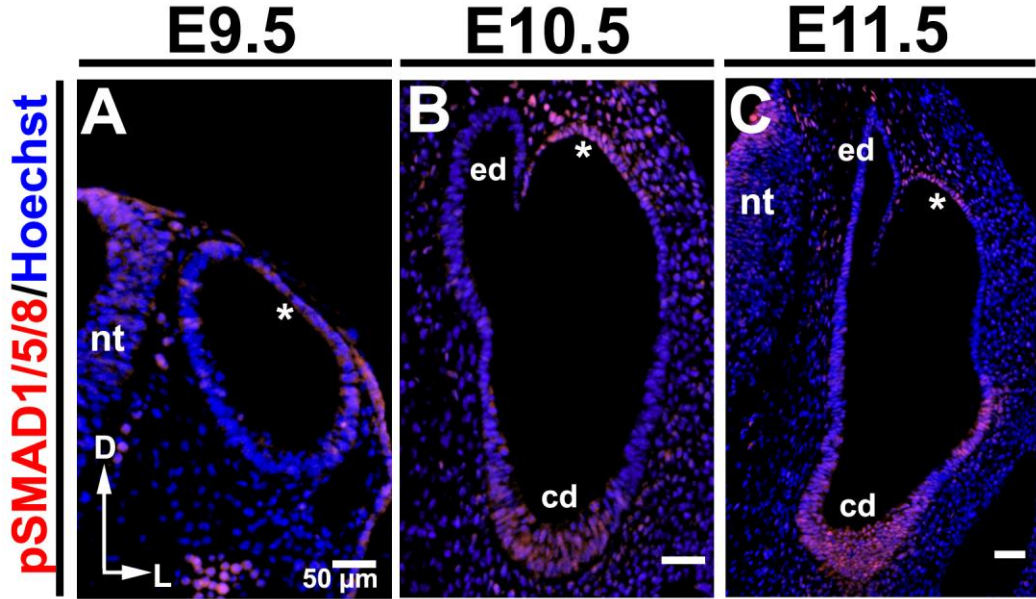

Supplemental Figure 6.

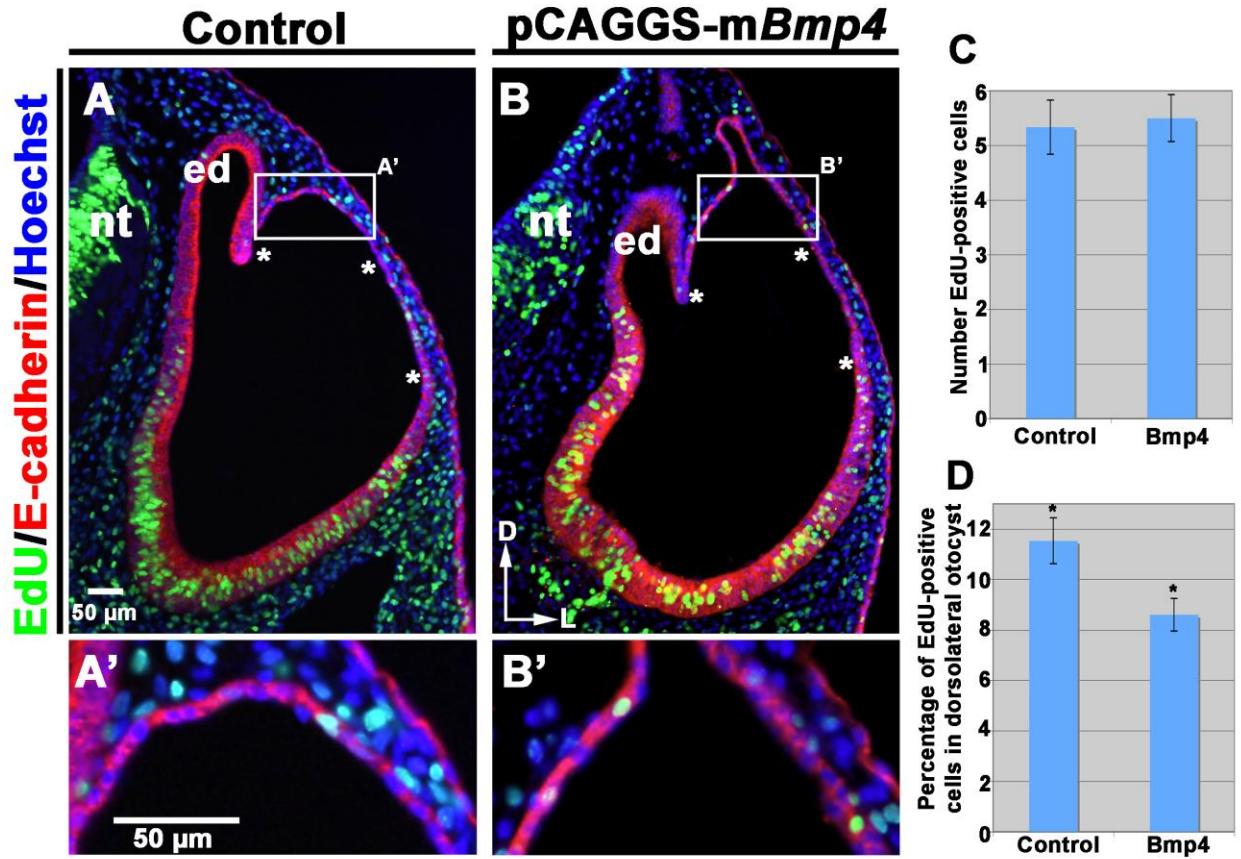

Supplemental Figure 7.

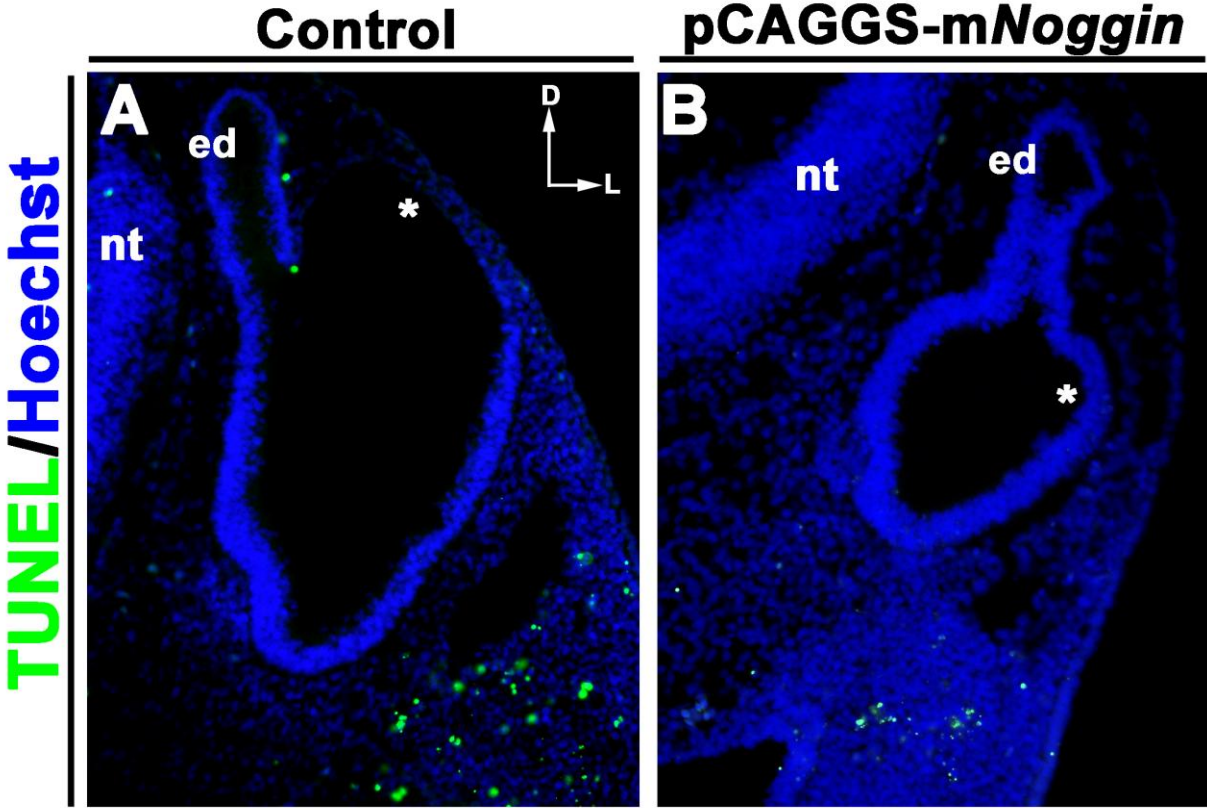



Supplemental Figure 8.

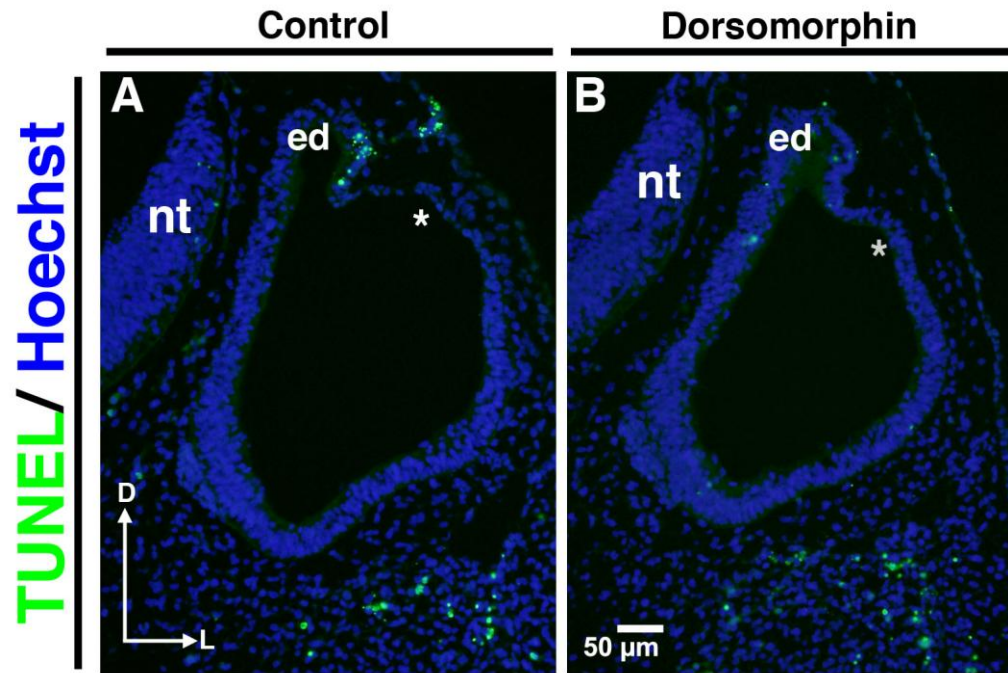



Supplemental Figure 9.

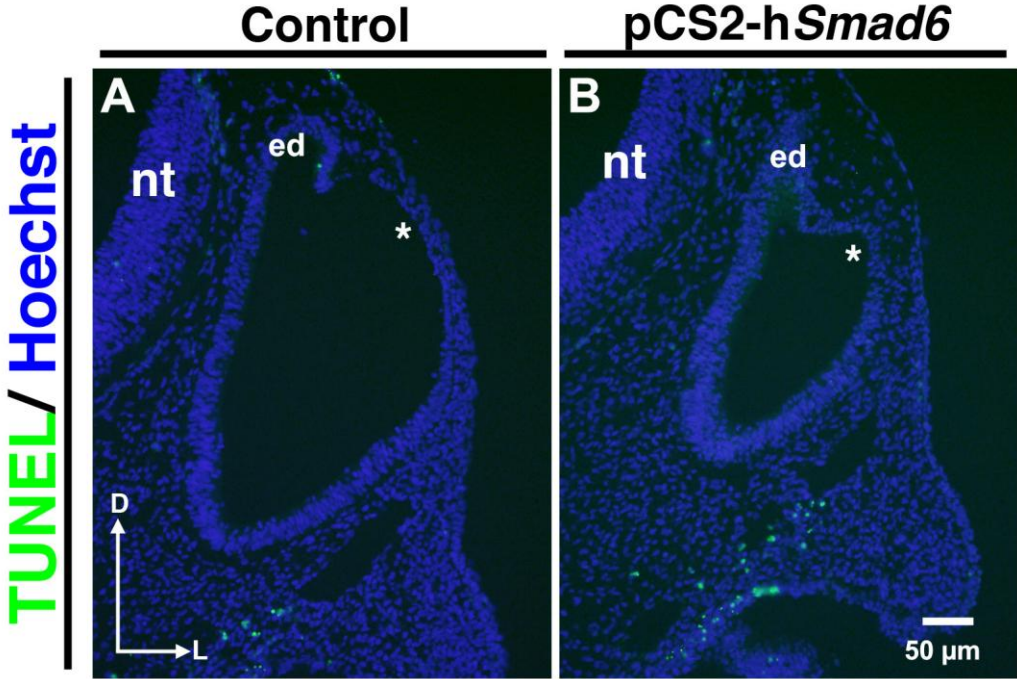

Supplement: NIHMS237321-supplement-01.pdf [file NIHMS237321-supplement-01.pdf]
