# Supplementary material
Source: PubMed Central journal article supplement (PMC2962452)
Supplement: NIHMS237321-supplement-02.pdf [file NIHMS237321-supplement-02.pdf]

**Supplemental Figure 1. The mouse dorsolateral otocyst undergoes a rapid thinning and expansion similar to that occurring in the chick otocyst.** (A-C) Transverse paraffin sections (stained with hematoxylin and eosin) at E9.5, 10.5, and 11.5. Asterisks mark the area of the otocyst undergoing rapid thinning and expansion. nt, neural tube; sg, statoacoustic ganglion; D, dorsal; M, medial. (A'-C') 3-D reconstructions of mouse otocysts from the sets of serial sections used to illustrate Figures A-C. Asterisks mark the area of the otocyst undergoing rapid thinning and expansion.

**Supplemental Figure 2. Expression of *Bmp* transcripts in the chick otocyst and adjacent tissues suggests a role for BMP signaling in patterning the dorsolateral otocyst.** Whole mount in situs (A-C, E-G) of *Bmp4* and 7, and sectioned in situs (D, H) at the levels indicated by the lines in (B) and (F). D, dorsal; A, anterior; L, lateral. (A-D) At stages 16-18, *Bmp4* is expressed in the dorsolateral region of the otocyst (HH 16: n = 8; HH 18: n = 8), and at HH 20, it is expressed in two localized spots marking the anterior and posterior cristae (n = 8). ed, endolymphatic duct. (E-H) At stages 16-20, *Bmp7* is expressed predominantly in anterior and posterior regions of the otocyst. Fainter expression of *Bmp7* also extends into the dorsolateral otocyst (HH 16: n = 8; HH 18: n = 8; HH 20: n = 8). ed, endolymphatic duct.

**Supplemental Figure 3. Expression of both type-I and type-II BMP receptors in the chick otocyst suggests a role for BMP signaling in patterning the dorsolateral otocyst.** Both type-IA and type-II BMP receptors are expressed throughout the wall of the chick otocyst, but type-IB does not seem to be expressed (A-C, arrows; D-F, otocysts enlarged; type-IA: n = 12; type-IB: n

Ohta et al.

= 12; type-II: n = 12), as well as being broadly expressed in the cranial region of the embryo at stage 18; asterisks mark the dorsolateral otocyst. Sections (G-I) of the otocyst show expression, especially dorsolaterally (asterisks), in the otocyst of type-IA and type-II receptors, but the type-IB receptor is not expressed in the dorsolateral otocyst (asterisks). D, dorsal; A, anterior; L, lateral; nt, neural tube.

**Supplemental Figure 4. Expression of both type-I and type-II BMP receptors in the mouse otocyst suggests a role for BMP signaling in patterning the dorsolateral otocyst.** Both type-I and type-II BMP receptors are expressed throughout the wall of the mouse otocyst (A-C, arrows; D-F, otocysts enlarged; type-IA: n = 4; type-IB: n = 4; type-II: n = 4), as well as in being broadly expressed in the cranial region of the embryo at E10.0; asterisks mark the dorsolateral otocyst. Sections (G-I) of the otocyst show expression throughout the otocyst of type-IA and type-II receptors, but the type-IB receptor seems to be expressed only weakly in the dorsolateral otocyst (asterisks). D, dorsal; A, anterior; L, lateral; nt, neural tube.

**Supplemental Figure 5. The mouse dorsolateral otocyst expresses pSMAD1/5/8, indicating that this portion of the otocyst receives and responds to BMP signaling as does the chick dorsolateral otocyst.** (A-C) Transverse sections (labeled with pSMAD1/5/8 antibody and Hoechst stain) showing pSMAD1/5/8 expression in the mouse otocyst at E9.5, E10.5, and E11.5 (E9.5: n = 2; E10.5: n = 2; E11.5: n = 2). Asterisks mark the dorsolateral otocyst, which undergoes rapid thinning and expansion; the ventral otocyst, which in (B, C) is initiating outgrowth to form the cochlear duct (cd), also expresses pSMAD1/5/8; D, dorsal; L, lateral; nt, neural tube; ed, endolymphatic duct.

**Supplemental Figure 6. Increased cell proliferation is not the cause of hyperexpansion of the dorsolateral otocyst in chick embryos in which *Bmp4* is over expressed.** (A, B)

Transverse sections pulsed with EdU (green) and counterstained with Hoechst stain (blue) and E-cadherin (red) from a control embryo and an experimental embryo at 48 hours after *Bmp4* over expression (HH 20; control: n = 3; *Bmp4*: n = 3). The embryos were labeled with EdU during the last 24 hours of incubation. (A', B') Enlargements of the boxes in A and B showing epithelial thinning in the dorsolateral otocyst wall. Only a few EdU-positive cells are present in the dorsolateral otocyst of control and experimental embryos, in contrast to the ventral otocyst. Asterisks mark the dorsolateral otocyst. D, dorsal; L, lateral; nt, neural tube. (C) Graph showing the quantification of EdU-labeled cells (means plus standard error of the mean from 3 control and 3 experimental embryos; EdU-labeled cells contained within 4-5 sections from individual embryos were counted) in the HH 20 dorsolateral otocyst. (D) Graph showing the percentage of EdU-positive cells present in the HH 20 dorsolateral otocyst (means plus standard error of the mean from 3 control and 3 experimental embryos; EdU-labeled cells within 4-5 sections from individual embryos were counted). \* $P < 0.05$  (Student's T-test). *Bmp4* over expression did not increase the number of proliferating cells in the dorsolateral otocyst; rather, the statistically significant decrease in the percentage of dividing cells suggests that *Bmp4* over expression actually decreased the number of dividing cells in the dorsolateral otocyst.

**Supplemental Figure 7. Programmed cell death is not the cause of failure of expansion of the dorsolateral otocyst in chick embryos in which *Noggin* is over expressed.** (A, B)

Transverse sections labeled with TUNEL and Hoechst stain from a control embryo and an

Ohta et al.

experimental embryo at 24 hours after *Noggin* over expression (HH 20; control: n = 4; *Noggin*: n = 4). In both the control and experimental embryo, no TUNEL-positive cells were detected in the dorsolateral otocyst (asterisks). Asterisks mark the dorsolateral otocyst, which fails to undergo normal expansion after treatment with *Noggin*. In contrast, scattered TUNEL-positive cells populate the head mesenchyme. D, dorsal; L, lateral; nt, neural tube; ed, endolymphatic duct.

**Supplemental Figure 8. Programmed cell death is not the cause of attenuated expansion of the dorsolateral otocyst in chick embryos treated with Dorsomorphin.** (A, B) Transverse sections labeled with TUNEL and Hoechst stain from a control embryo and an experimental embryo at 12 hours after Dorsomorphin treatment (HH 18; control: n = 3; Dorsomorphin: n = 3). In both the control and experimental embryo, very few TUNEL-positive cells are present in the otocyst, and none are present in its dorsolateral region. However, TUNEL-positive cells occupy the head mesenchyme and surface ectoderm overlying the otocyst of both the experimental and control embryos. Asterisks mark the dorsolateral otocyst. D, dorsal; L, lateral; nt, neural tube; ed, endolymphatic duct.

**Supplemental Figure 9. Programmed cell death is not the cause of failure of expansion of the dorsolateral otocyst in chick embryos subjected to *Smad6* over expression.** (A, B) Transverse sections stained with TUNEL and Hoechst stain from a control embryo and an experimental embryo at 24 hours after *Smad6* over expression (HH 20; control: n = 3; *Smad6*: n = 3). In both the control and experimental embryo, no TUNEL-positive cells are present in the dorsolateral (asterisks) otocyst. D, dorsal; L, lateral; nt, neural tube; ed, endolymphatic duct.
